# Supplementary material
Source: PubMed Central journal article supplement (PMC3058957)

Supplemental Fig. 1

Supplemental Fig. 1. Expression profile of PKA subunits in AMs. AMs lysates were subjected to Western blot analysis of the indicated PKA subunit. Results from one experiment of three are shown.

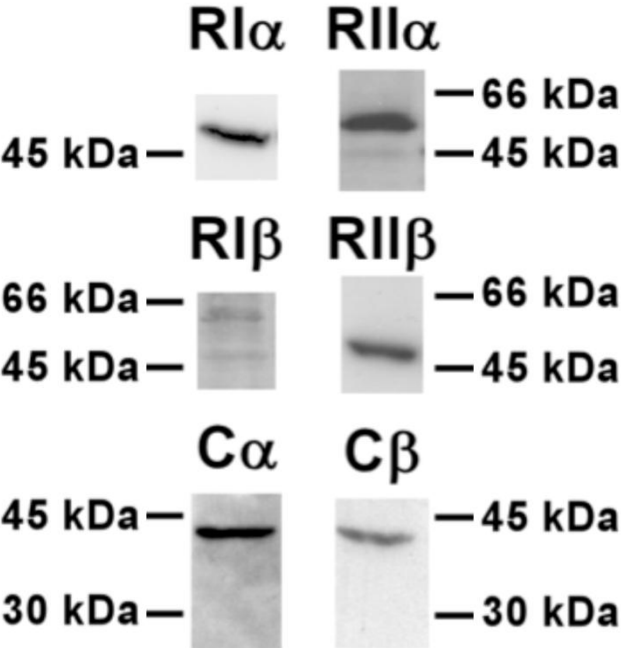

Supplement: supp_M110.187815_PetersGoldenb.pdf [file supp_M110.187815_PetersGoldenb.pdf]
